# Supplementary material for: The Influence of Sex in Stroke Thrombolysis: A Systematic Review and Meta-Analysis
Source: PubMed Central journal article supplement — J Clin Neurol. 2018 Jan 10;14(2):141–52. doi: 10.3988/jcn.2018.14.2.141 (PMC5897195; doi:10.3988/jcn.2018.14.2.141), 2018-01-10
Supplement: jcn-14-141-s001.pdf [file jcn-14-141-s001.pdf]

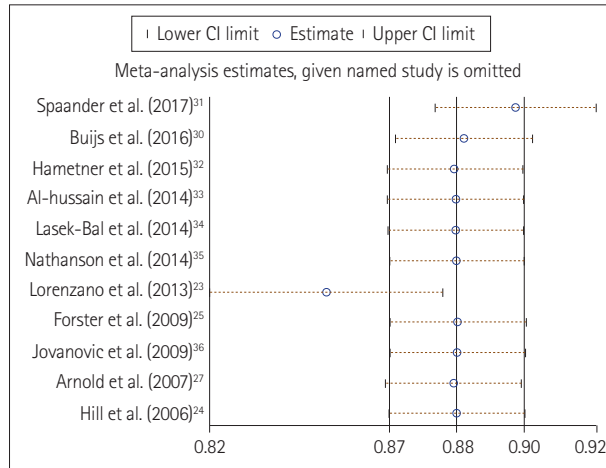

**Supplementary Fig. 1.** Sensitivity analysis of a good functional outcome by sequentially removing individual studies. CI: confidence interval.
